# Supplementary material for: How do clients in Australia experience Consumer Directed Care?
Source: Springer Nature journal article supplement (doi:10.1186/s12877-018-0838-8), 2018-06-25
Supplement: MOESM2 [file 15878314]

## Additional file 2: CDC Codes and Categories

| Code Number | Code Name                                      | Associated Category | Categories                                                      | Code Number | Associated Themes                                          | Category Numbers for Themes |
|-------------|------------------------------------------------|---------------------|-----------------------------------------------------------------|-------------|------------------------------------------------------------|-----------------------------|
| 1           | After Effects                                  | 2                   | Getting Information rather than knowledge                       | 1           | Not Sure What CDC is                                       | 1,5,7,9                     |
| 2           | Agency Identifiers                             | 1,7                 | Accepting Compromises and Changes to Current Service Provision  | 2           | I am grateful for the services provided to me              | 2,6,8                       |
| 3           | Banking                                        | 2                   | Rationalising the Quality of Care                               | 3           | Without these services I would not be able to do what I do | 3,4                         |
| 4           | Care Provision                                 | 9                   | Non-consideration of alternatives                               | 4           |                                                            |                             |
| 5           | CDC System                                     | 1                   | Lack of understanding of terminology and information in reports | 5           |                                                            |                             |
| 6           | Change                                         | 4                   | Vulnerability to Service Reduction                              | 6           |                                                            |                             |
| 7           | Choice of Carer                                | 7                   | Administration                                                  | 7           |                                                            |                             |
| 8           | Choice of CDC Package Manager                  | 7,9                 | Experience with previous aged care packages                     | 8           |                                                            |                             |
| 9           | Communication with Others about CDC            | 8                   | Assessment Process                                              | 9           |                                                            |                             |
| 10          | Compliance by Agency                           | 2,8                 |                                                                 |             |                                                            |                             |
| 11          | Confidence                                     | 6                   |                                                                 |             |                                                            |                             |
| 12          | Confidentiality                                | 7                   |                                                                 |             |                                                            |                             |
| 13          | Confirmation of Knowledge                      | 1,8                 |                                                                 |             |                                                            |                             |
| 14          | Control of Service                             | 2,7                 |                                                                 |             |                                                            |                             |
| 15          | Cost                                           | 3                   |                                                                 |             |                                                            |                             |
| 16          | Day Care                                       | 2                   |                                                                 |             |                                                            |                             |
| 17          | Discussion                                     | 1,8                 |                                                                 |             |                                                            |                             |
| 18          | Disease State                                  | 6                   |                                                                 |             |                                                            |                             |
| 19          | Dissatisfaction                                | 2,9,6               |                                                                 |             |                                                            |                             |
| 20          | Distance                                       | 2                   |                                                                 |             |                                                            |                             |
| 21          | Dying and Death                                | 6                   |                                                                 |             |                                                            |                             |
| 22          | Emotional Response                             | 6                   |                                                                 |             |                                                            |                             |
| 23          | Establishment of Service                       | 1,7,9               |                                                                 |             |                                                            |                             |
| 24          | Expectations                                   | 3                   |                                                                 |             |                                                            |                             |
| 25          | Extension of Care                              | 2,3,4,6             |                                                                 |             |                                                            |                             |
| 26          | Family Care Provision                          | 2,3,4,6             |                                                                 |             |                                                            |                             |
| 27          | Food Preparation                               | 2,4                 |                                                                 |             |                                                            |                             |
| 28          | Funerals                                       | 3                   |                                                                 |             |                                                            |                             |
| 29          | Future Recommendations                         | 2,3                 |                                                                 |             |                                                            |                             |
| 30          | Gardening                                      | 2                   |                                                                 |             |                                                            |                             |
| 31          | Gender of Personnel                            | 2,3                 |                                                                 |             |                                                            |                             |
| 32          | Government                                     | 7,8                 |                                                                 |             |                                                            |                             |
| 33          | House Maintenance                              | 2                   |                                                                 |             |                                                            |                             |
| 34          | Incontinence                                   | 6                   |                                                                 |             |                                                            |                             |
| 35          | Just Told                                      | 1,8,2               |                                                                 |             |                                                            |                             |
| 36          | Length of time of service of individual carers | 2                   |                                                                 |             |                                                            |                             |
| 37          | Limits to preferred services                   | 2,3,8               |                                                                 |             |                                                            |                             |

|    |                                    |             |  |  |  |  |
|----|------------------------------------|-------------|--|--|--|--|
| 38 | No choice in personnel             | 2           |  |  |  |  |
| 39 | No choice in time                  | 2           |  |  |  |  |
| 40 | No Knowledge                       | 1,5,8       |  |  |  |  |
| 41 | Non-recognition of Previous Carers | 2           |  |  |  |  |
| 42 | Outside Institutions               | 2,4         |  |  |  |  |
| 43 | Paying Bills                       | 2,7         |  |  |  |  |
| 44 | Physical Disabilities              | 6           |  |  |  |  |
| 45 | Places of Care                     | 2,4         |  |  |  |  |
| 46 | Podiatry                           | 2           |  |  |  |  |
| 47 | Reason for Type of Care            | 2,6         |  |  |  |  |
| 48 | Religion                           | 3           |  |  |  |  |
| 49 | Satisfaction                       | 8           |  |  |  |  |
| 50 | Service Use Prior to CDC           | 2,8         |  |  |  |  |
| 51 | Services Not Provided              | 2,4         |  |  |  |  |
| 52 | Setting Preferences                | 2,3,4,8     |  |  |  |  |
| 53 | Shopping                           | 2           |  |  |  |  |
| 54 | Social Activities                  | 2           |  |  |  |  |
| 55 | Social Pressures                   | 2,3,4,6,8   |  |  |  |  |
| 56 | Statements                         | 5           |  |  |  |  |
| 57 | Terminology                        | 5,7         |  |  |  |  |
| 58 | Time                               | 2,3,4,6,7,8 |  |  |  |  |
| 59 | Time After Initial CDC Care        | 8           |  |  |  |  |
| 60 | Travel                             | 2           |  |  |  |  |
| 61 | Types of Service                   | 2           |  |  |  |  |
| 62 | What CDC Means                     | 1,8         |  |  |  |  |
| 63 | When Service First Started         | 1,8,9       |  |  |  |  |
| 64 | Who Told Client About the Program  | 1,7,9       |  |  |  |  |
| 65 | Widowhood                          | 6           |  |  |  |  |
